# Supplementary material
Source: Research Square preprint supplement (doi:10.21203/rs.3.rs-8422568/v1)
Supplement: Supplementary file 1 [file 850a8d43cd741a7d8f641f1e.docx]

**Growing Synthetic Nacre: Simultaneous Deposition and Assembly of Bricks via Light-Based Printing**

Zizhen Ding1,2, Reza Shakibanezhad1,2, Travis Klein1,2, and Mohammad Mirkhalaf1,2,3*

*1 School of Mechanical, Medical and Process Engineering, Queensland University of Technology (QUT), 4000 Brisbane, QLD, Australia.*

*2 Centre for Biomedical Technologies, Queensland University of Technology (QUT), 4059 Brisbane, QLD, Australia*

*3 Centre for Materials Science, Queensland University of Technology (QUT), 4000 Brisbane, QLD, Australia*

**Corresponding author:*[*mohammad.mirkhalaf@qut.edu.au*](mailto:mohammad.mirkhalaf@qut.edu.au)

**Supplementary figures**


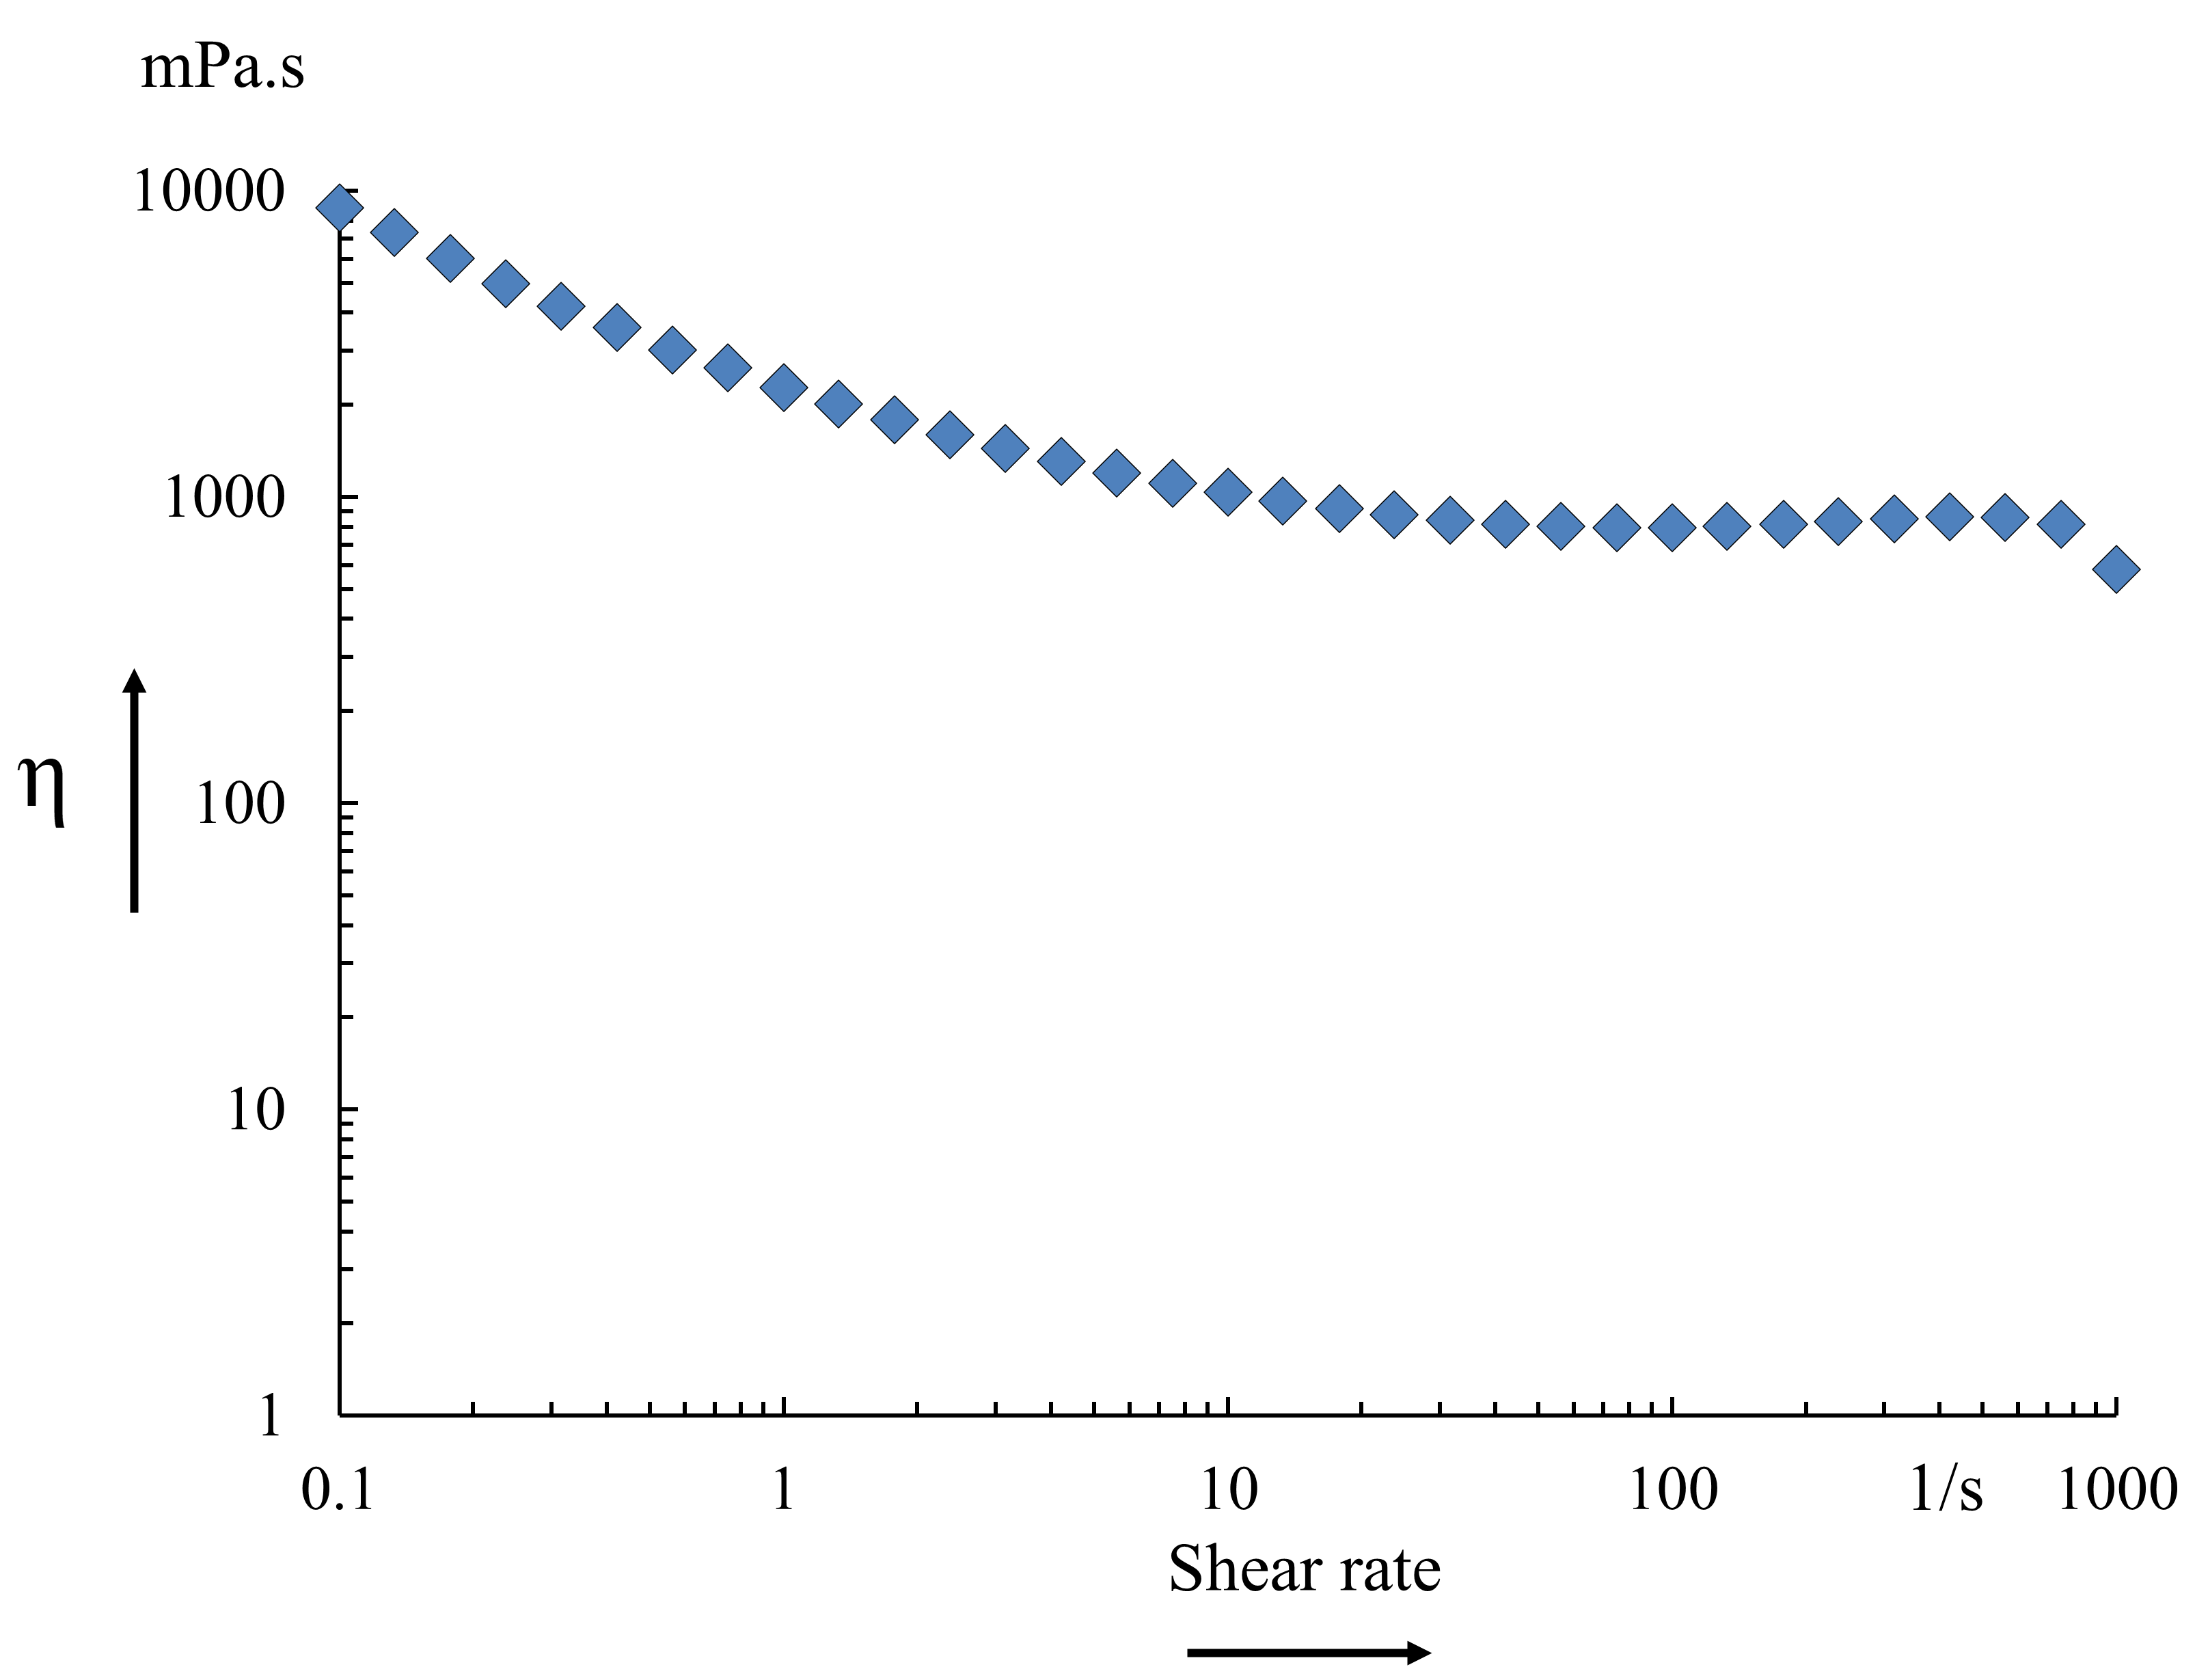


**Supplementary Fig. 1.** The rheological behaviour of ceramic resin with 57 wt% ceramic particle concentration.


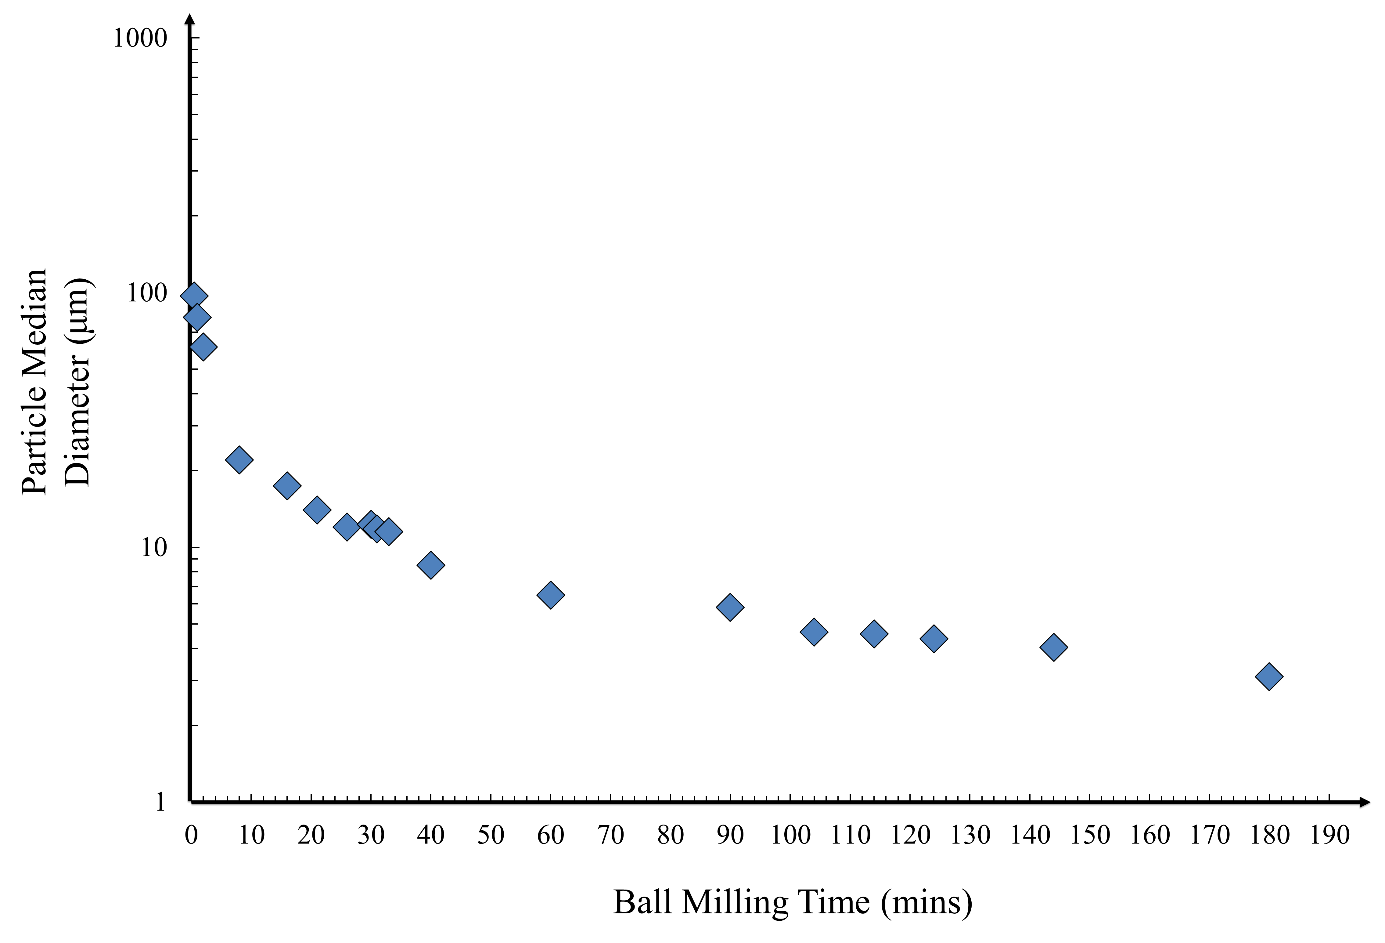


**Supplementary Fig. 2.** The alumina particle diameter profile measured in with different ball milling process times (mins).


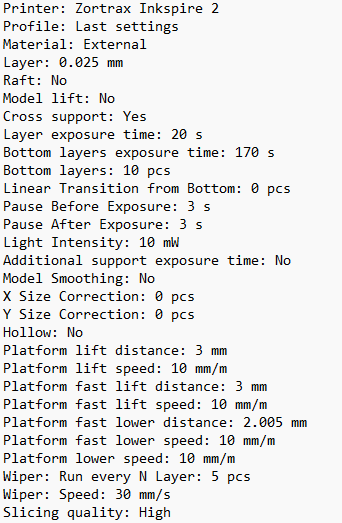


**Supplementary Fig. 3.** The printing parameters for the nacre-like architecture.


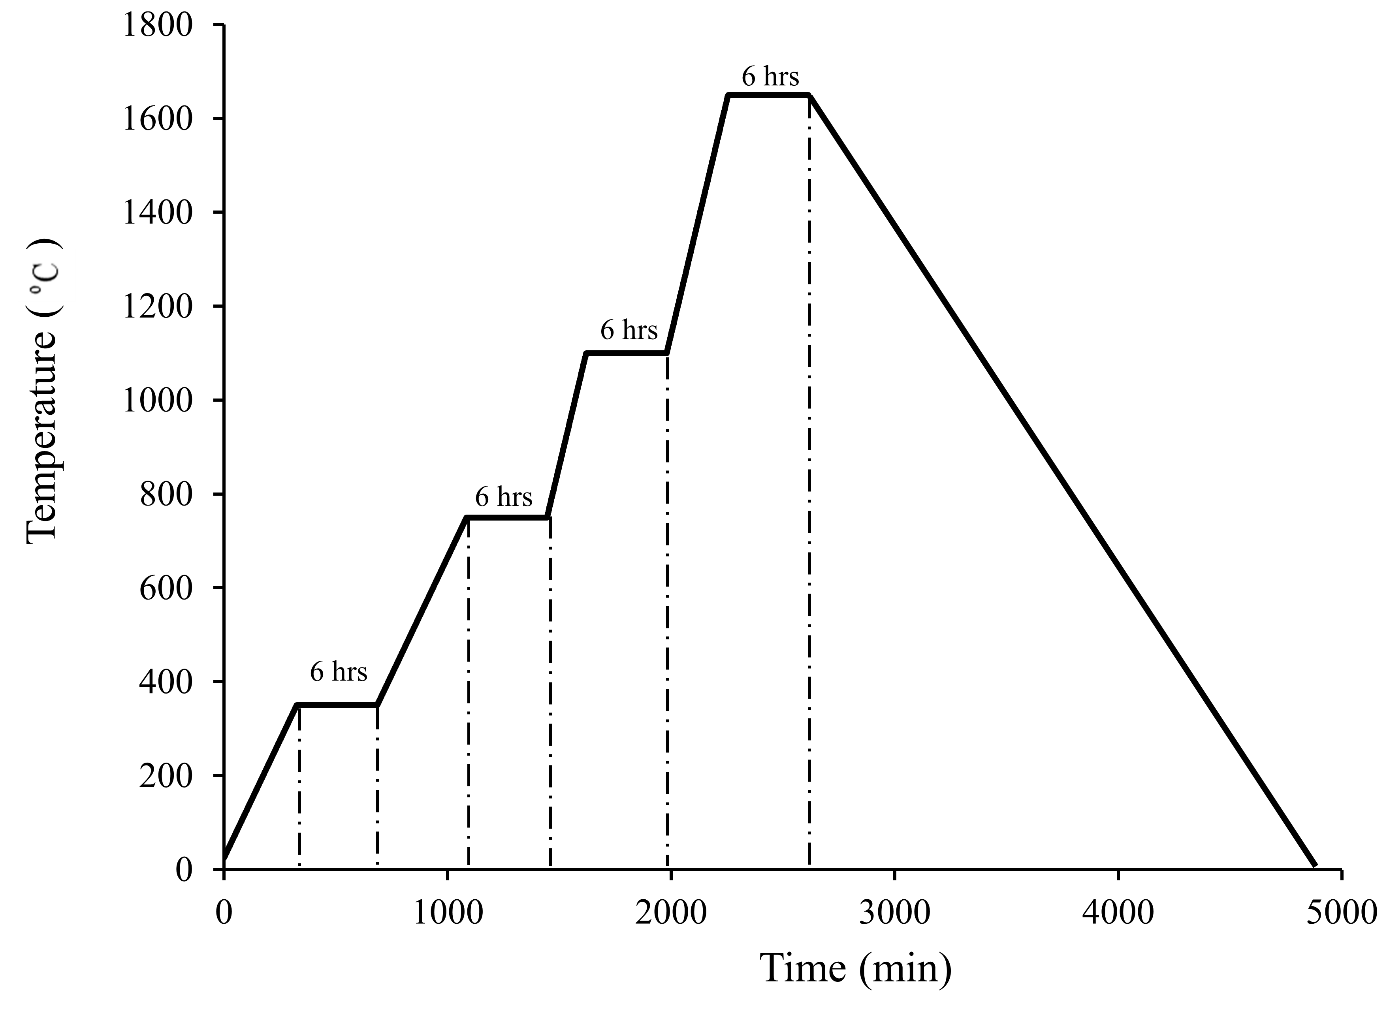


**Supplementary Fig. 4.** The sintering profile. **
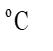
**

Temperature ( )

Time (min)


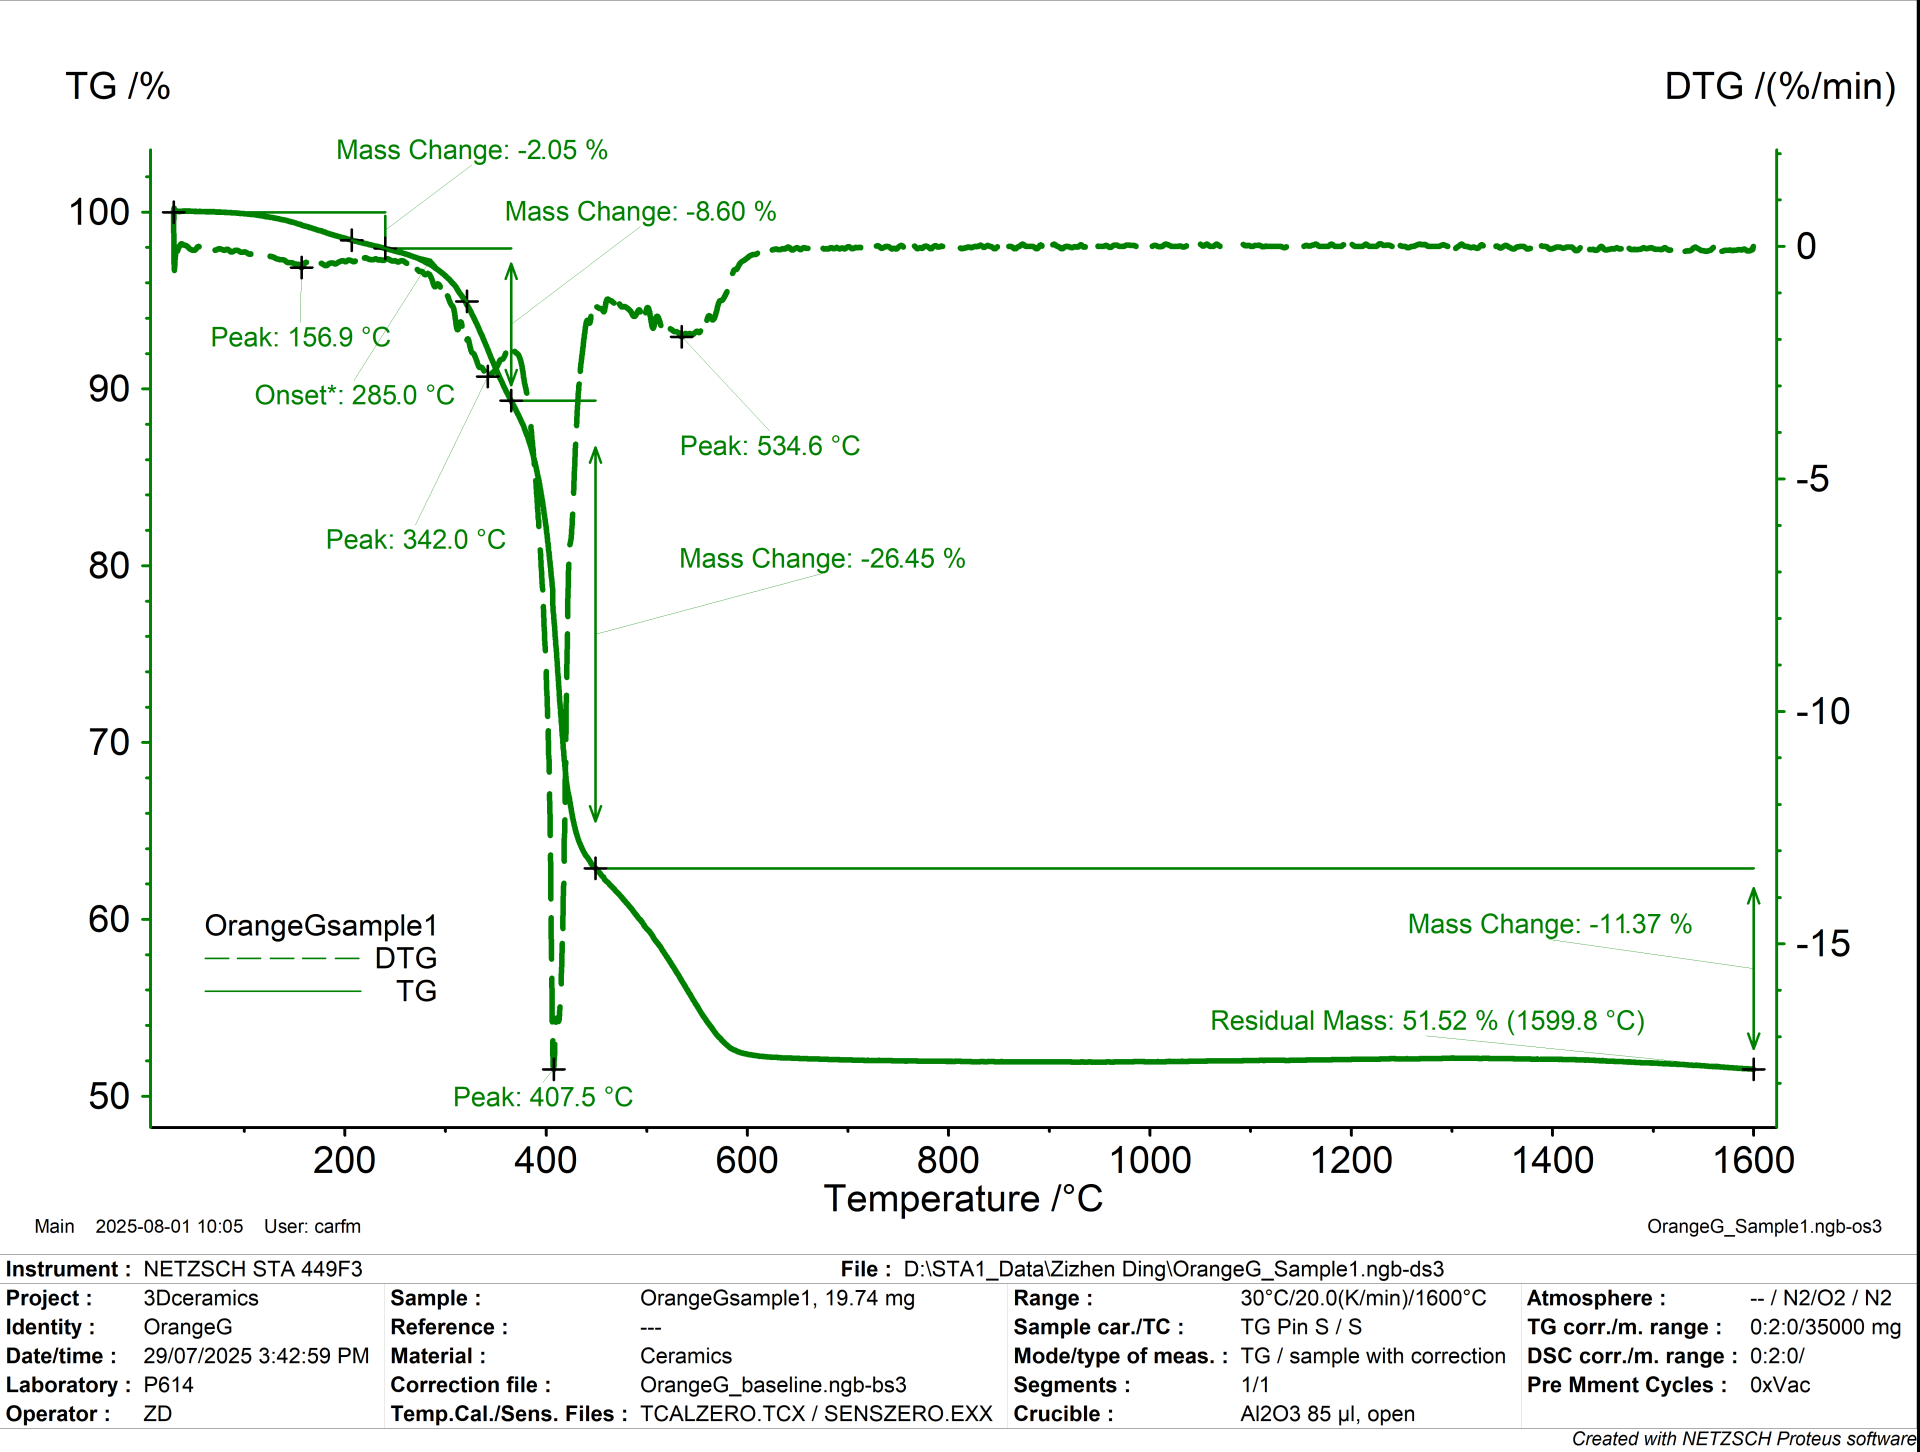


**Supplementary Fig. 5.** The TGA analysis of the printed specimen. **
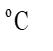
**

Temperature ( )

Time (min)

**The comparison between different polymers**


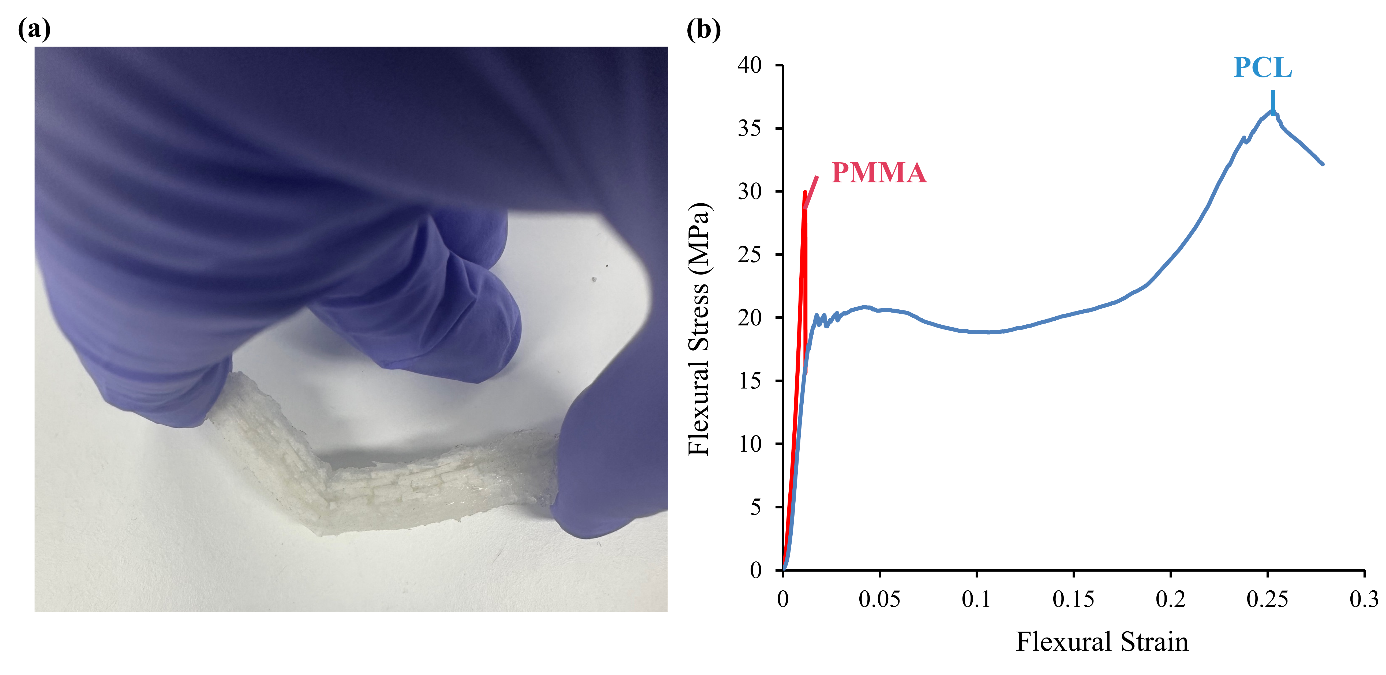


**Supplementary Fig. 6. The comparison between different polymer infiltrations.** (a) The infiltration of the composite with silicon. (b) The stress-strain curve of the composite infiltrated with PMMA and PCL

As seen in Figure S6a, the composite infiltrated with silicon is too soft and deformable to be placed on the universal testing machine for mechanical testing. By comparing the stress-strain curves of the composite infiltrated with PMMA and PCL, it can be concluded that the sample infiltrated with PMMA did not exhibit any energy absorption ability and failed catastrophically at less than 0.05 % strain. The flexural strength of the composite infiltrated with PCL is also higher than that infiltrated with PMMA. The same silanization process was followed with the sample to be infiltrated with PMMA. PMMA was infiltrated into the architecture via free-radical polymerisation of methyl methacrylate (MMA) (Merck, USA) with 0.5 wt% of Azobisisobutyronitrile (AIBN) (Merck, USA) in a plastic bag surrounded by a hot water bath of 75. The nacre-like architecture was first put into a plastic bag with 10 g of MMA solution. Next, the plastic bag was placed in a 250 ml beaker with water at 75. 0.5 wt% of AIBN was then added to the plastic bag and dissolved in MMA. After 30 minutes of reaction, the vacuum created by the hot water pushed the MMA solution into the architecture. By removing the residual MMA solution on the architecture surface and continuing the heating process, a nacre-like composite with PMMA infiltration was obtained.

**The mechanical testing set-up for the composite and the calculation process**


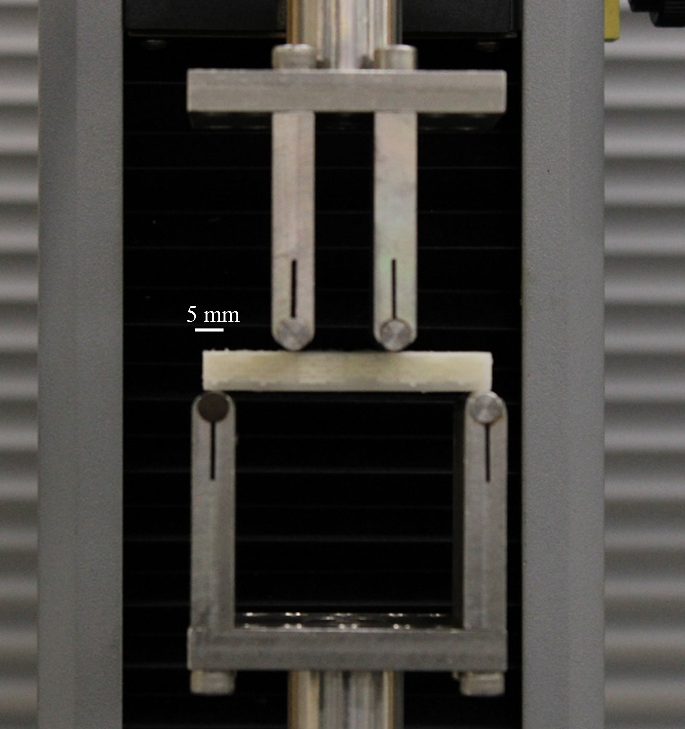


**Supplementary Fig. 7.** The mechanical testing set-up of the 4-point bending test.

The flexural strength of the composite was tested using an Instron universal testing machine with a loading rate of 0.3 mm/min and an upper span of 18.6 mm and a lower span of 50 mm. *In situ* images were captured throughout the entire testing period, and the data on the force and displacement were collected automatically through the Instron software. The flexural stress and strain of all composites were then computed using the equations below under the assumption that the composite is homogeneous throughout the layers and deforms linearly elastically during the bending period:

S1

S2

Where is the flexural strength (*MPa*), is the applied load (*N*), *L* is the distance between the lower span (*mm*), is the distance between the upper span (*mm*), is the width of the sample (*mm*), is the thickness of the sample (*mm*), is the flexural strain (%), and is the mid-plane deflection of the composite (*mm*). The stiffness (flexural modulus) of each composite was determined as the slope of the stress-strain curve at the initial linear range, and the total energy absorption was derived from the area under the stress-strain curve at 25 % of strain.

**
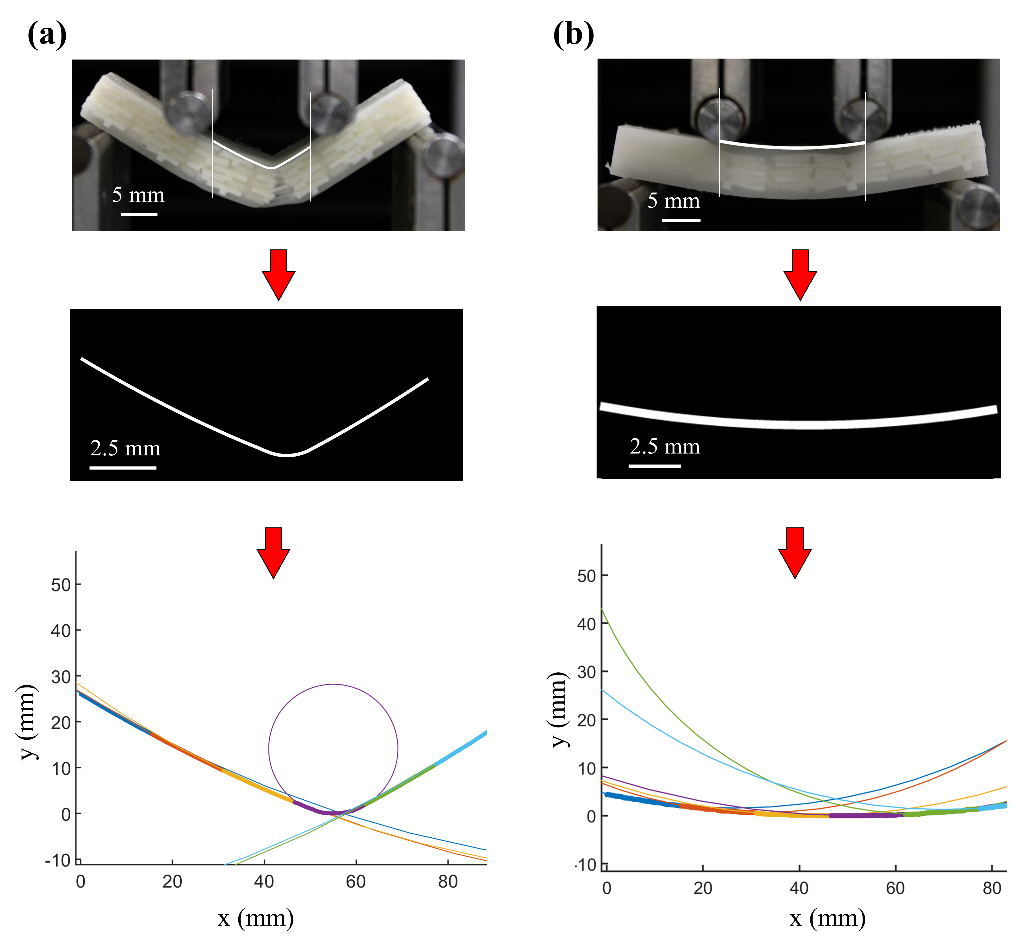
**

**Supplementary Fig. 8. The measurement process of the radius of curvature for the samples with different aspect ratios**. (a) aspect ratio = 5; (b) aspect ratio = 10.

**
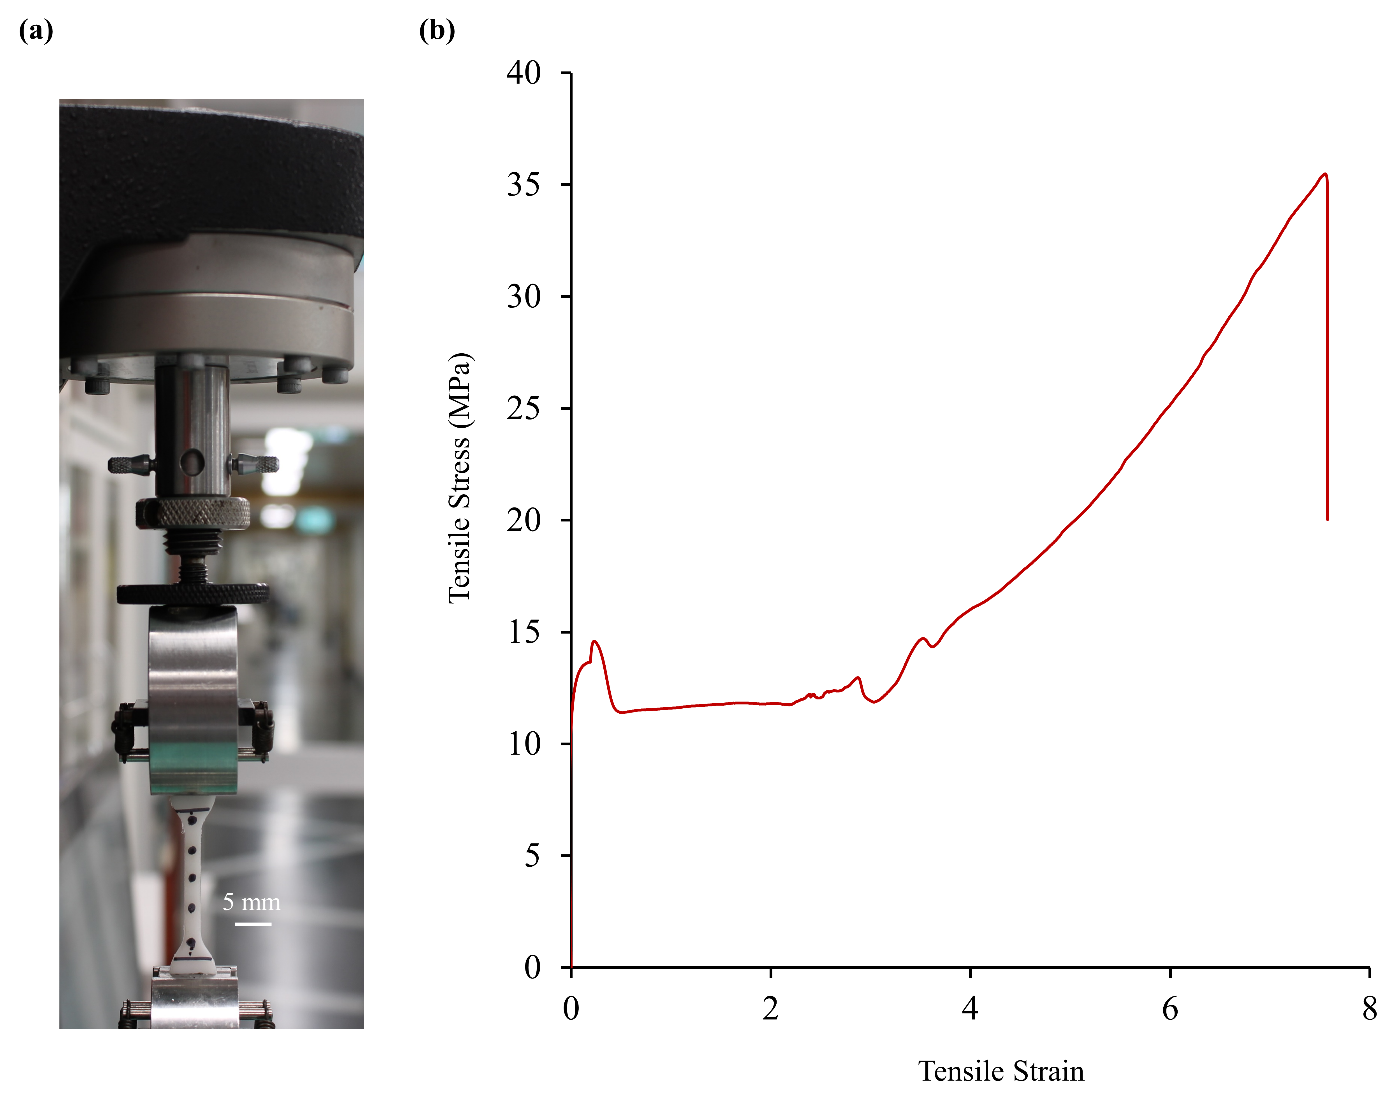
**

**Supplementary Fig. 9. The testing setup and stress-strain curve of PCL tensile testing.** (a) The mechanical testing set-up for pure PCL, and (b) the stress-strain curve for pure PCL.


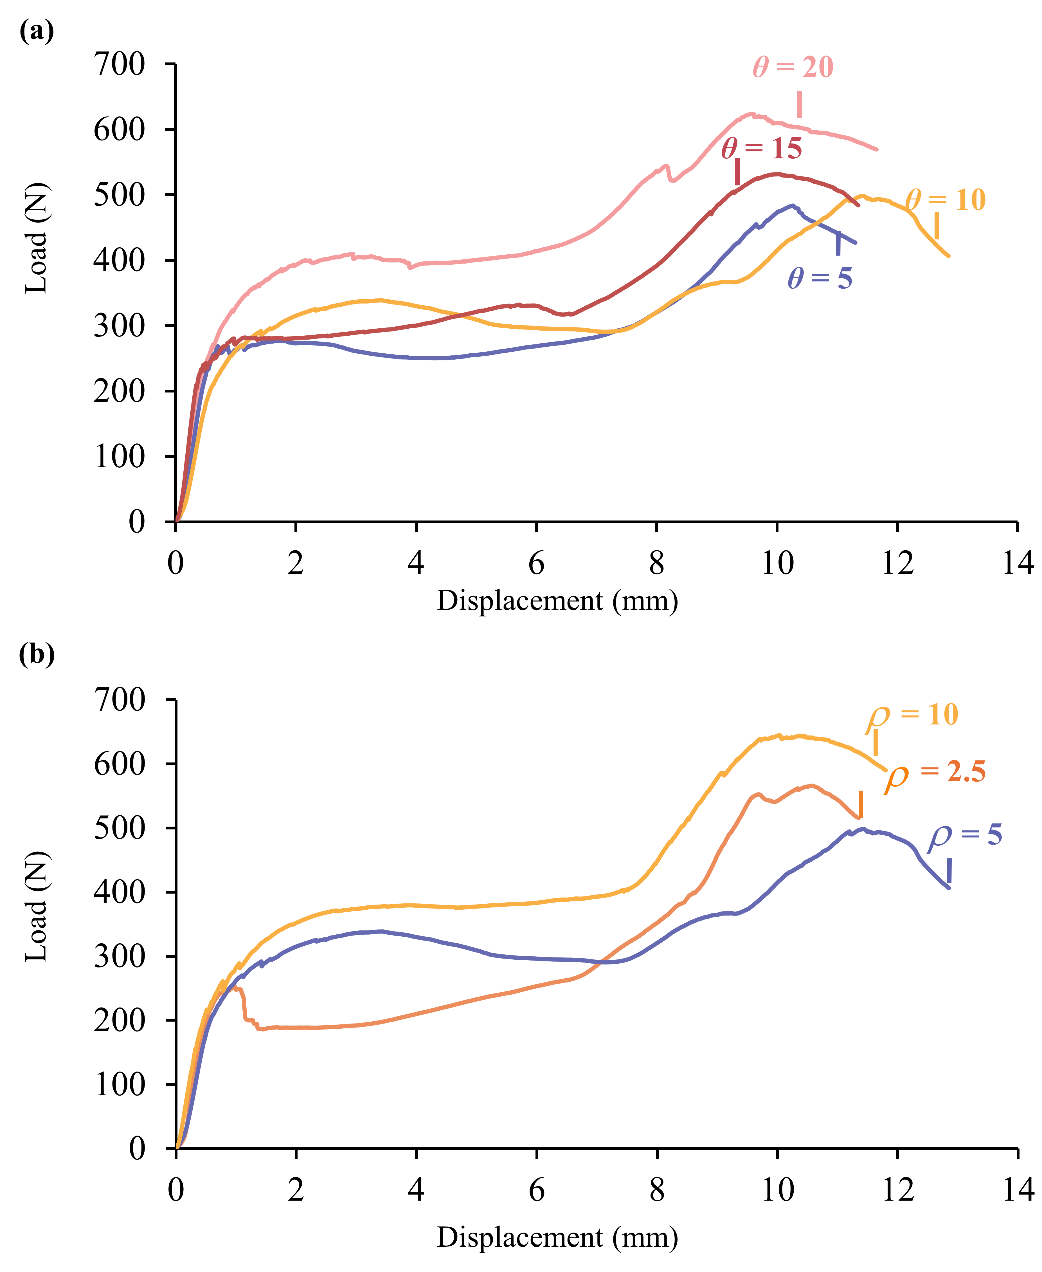


**Supplementary Fig. 10. The load-displacement curve for the nacre-like composites.** (a) The nacre-like composite with a consistent aspect ratio of 5 and different interlocking angles , and (b) the nacre-like composite with a consistent interlocking angle and different aspect ratios .

**
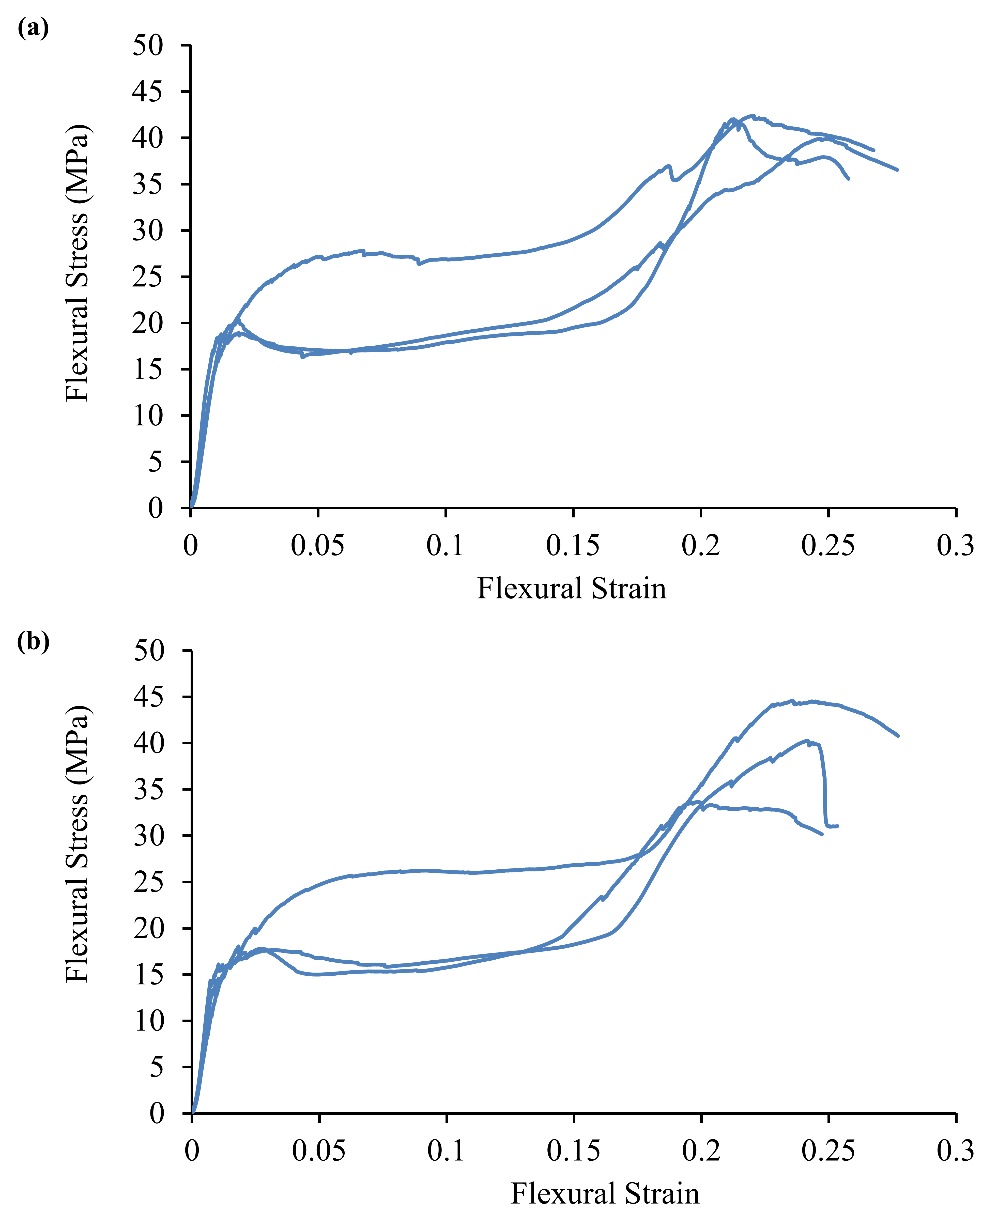
**

**SupplementaryFig*.* 11. The repetitions of the stress-strain curves for** (a) the sample with aspect ratio = 5, and interlocking angle = and (b) for the sample with an aspect ratio = 10, and interlocking angle = .

**
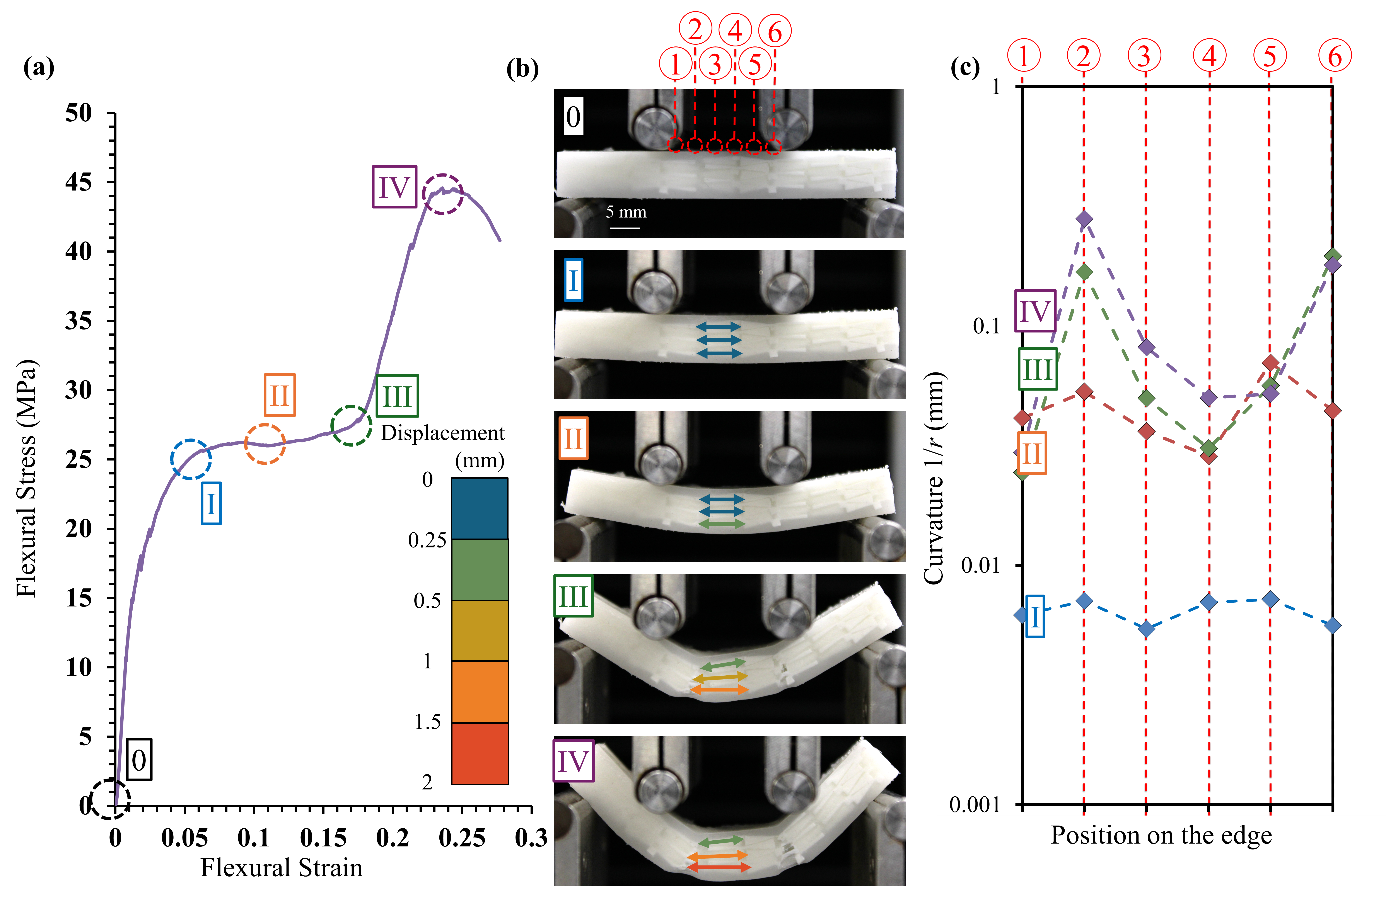
**

**Supplementary Fig. 12. The stress-strain curve of the represented bending test with its deformation analysis.** (a) The stress and strain curve of the infiltrated ceramic sample with an aspect ratio = 10 and interlocking angle θ =. (b) The displacement map between the platelets. The arrows represent the displacement between the platelets at different stages of deformation. (c) How the radius of curvature changes along the edge of the samples at different stages of deformation.

**
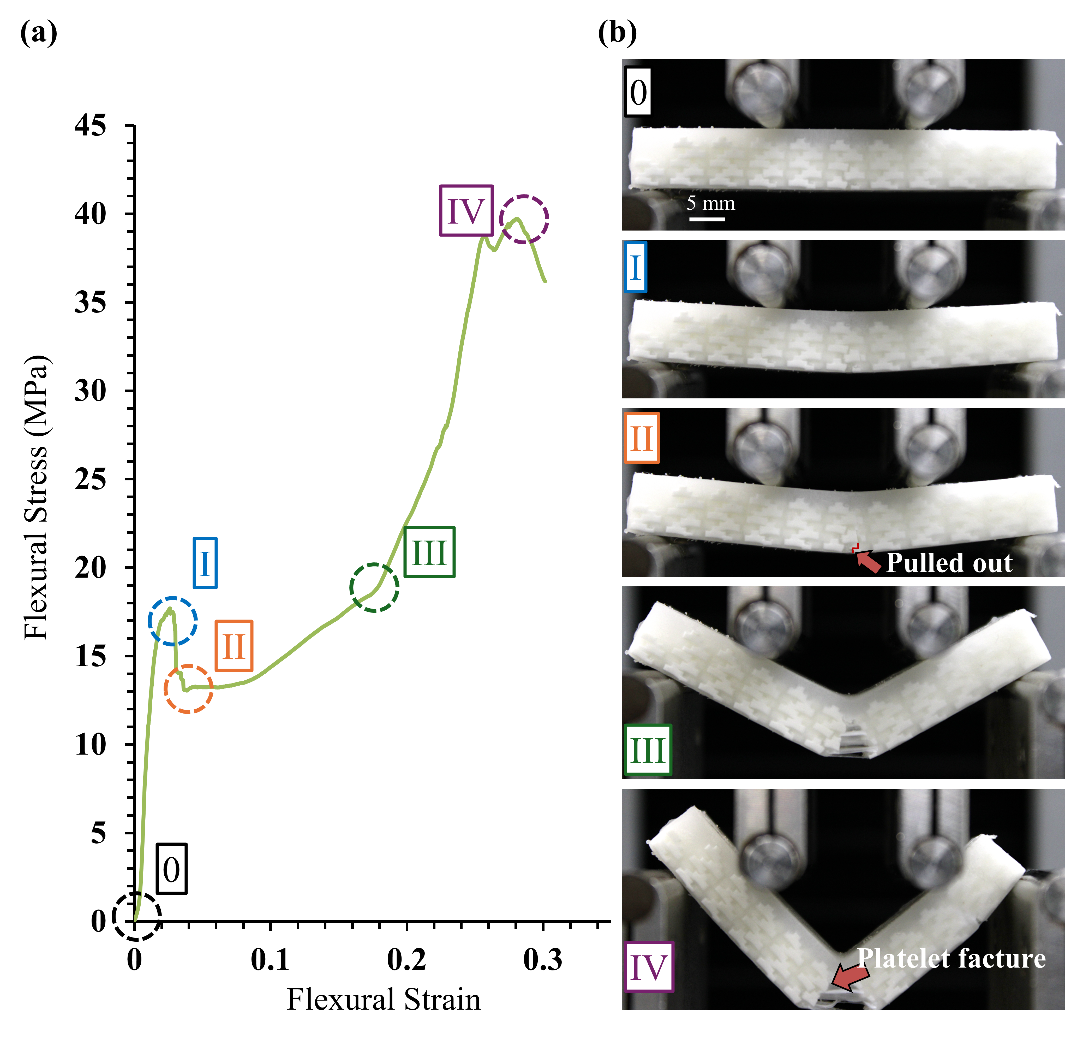
**

**Supplementary Fig. 13. The stress-strain curve of the represented bending test with its deformation analysis.** (a) The stress and strain curve of the infiltrated ceramic sample with an aspect ratio = 2.5 and interlocking angle θ =. (b) The in situ images taken during different stages of deformation with indications of platelet pull-out and fracture.

**The mechanical testing set-up for the pure ceramics and the calculation process**

**
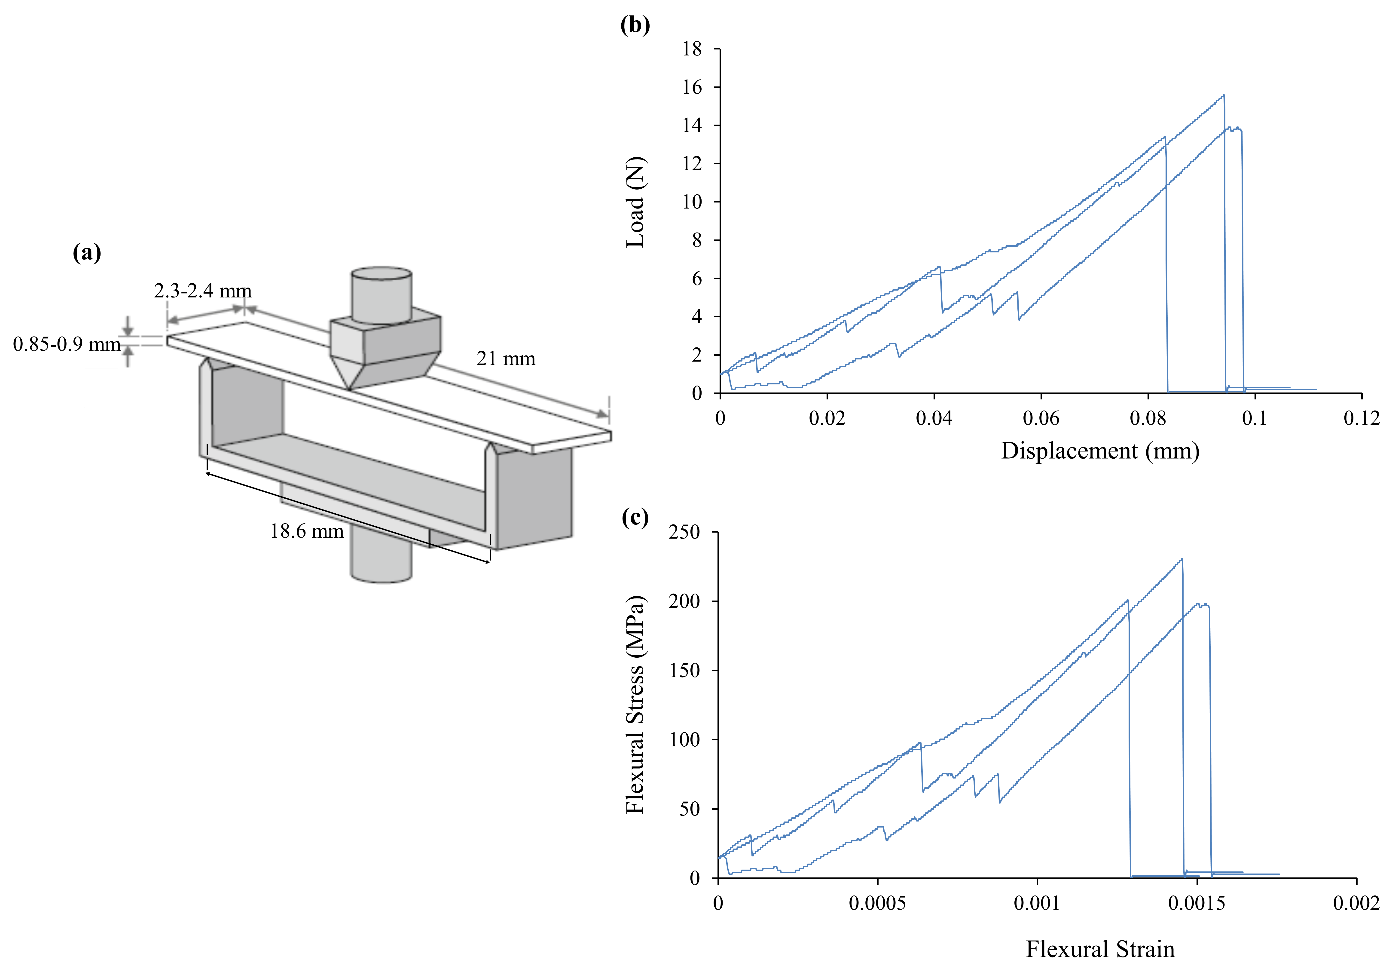
**

**Supplementary Fig. 14. The three-point bending test for the pure ceramic plates.** (a) The mechanical testing set-up for pure ceramic. (b)The load-displacement curve for pure PCL, and (c) the stress-strain curve for the pure ceramics (N=3)

The flexural strength of the ceramics was tested using an Instron universal testing machine with a loading rate of 0.3 mm/min and a span of 18.6 mm. Three tests were conducted for the pure ceramic plates with the dimensions indicated above. The flexural stress and strain of all ceramics were then computed using the equations below:

S3

S4

Where is the flexural strength (*MPa*), is the applied load (*N*), *L* is the distance between the span (*mm*), is the width of the sample (*mm*), is the thickness of the sample (*mm*), is the flexural strain (%), and is the bending deflection of the composite at load (*mm*).

The stiffness (flexural modulus) of each composite was determined as the slope of the stress-strain curve at the initial linear range, and the total energy absorption was derived from the area under the stress-strain curve.

However, for brittle materials like alumina, the area under the curve does not represent the true energy dissipation, as the failure is catastrophic and much of the energy is dissipated through dynamic effects and transferred to the test fixtures 1. In all the pure ceramic samples tested under bending, a crack consistently formed at the middle of the beams. This resulted in the unit volume formed by the crack being equal to the cross-sectional area of the beams multiplied by the span between two supports. Thus, by applying a critical energy release rate 27 for alumina ceramic 2. We could determine the actual energy absorbed per unit volume of the pure ceramic by multiplying with the cross-sectional area of the beam and dividing by the unit volume of the beam.

**
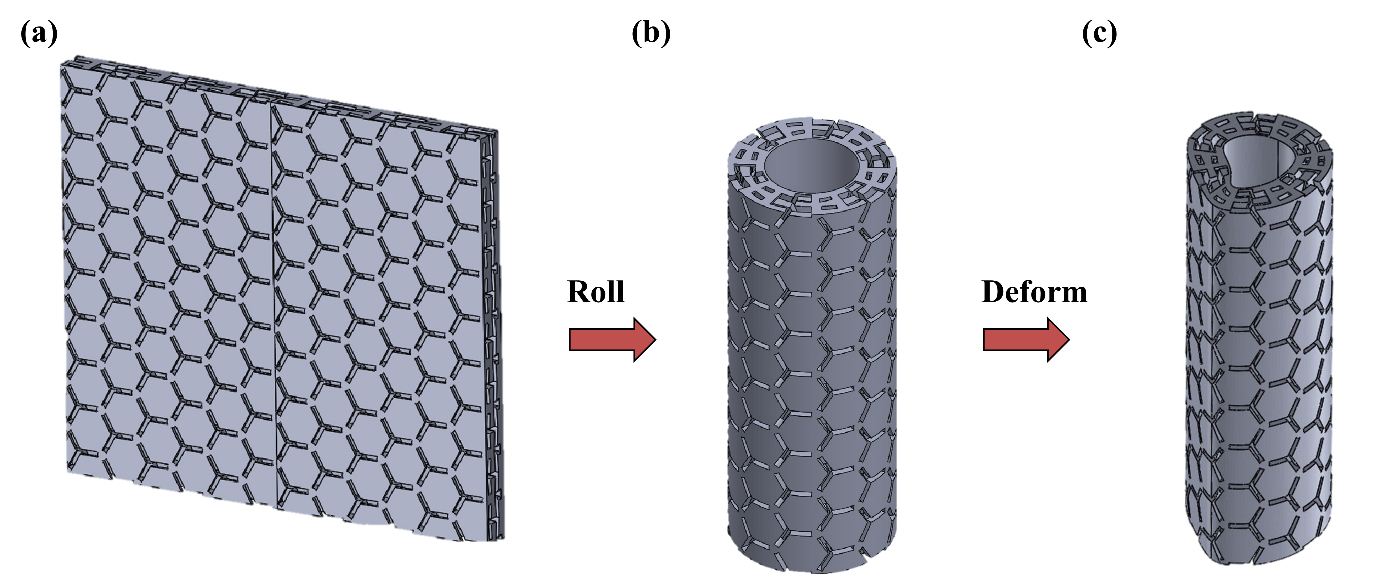
**

**Supplementary Fig. 15. The design process for the anatomically shaped nacre-like construct.** (a) The design process would start from a nacre-like sheet sample, (b) rolled into a column, and (c) deformed into the shape of a human tibia using SolidWorks.

**
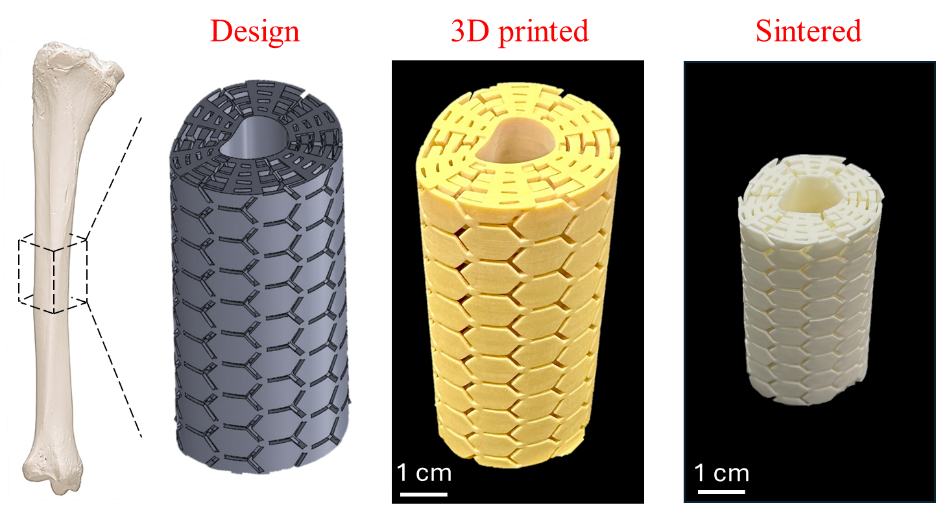
**

**Supplementary Fig. 16.** The demonstration of the designed, fully printed, and sintered nacre-like composite that duplicates the human tibia shape with 5 layers of interlocking mechanisms.

Displacement (mm)


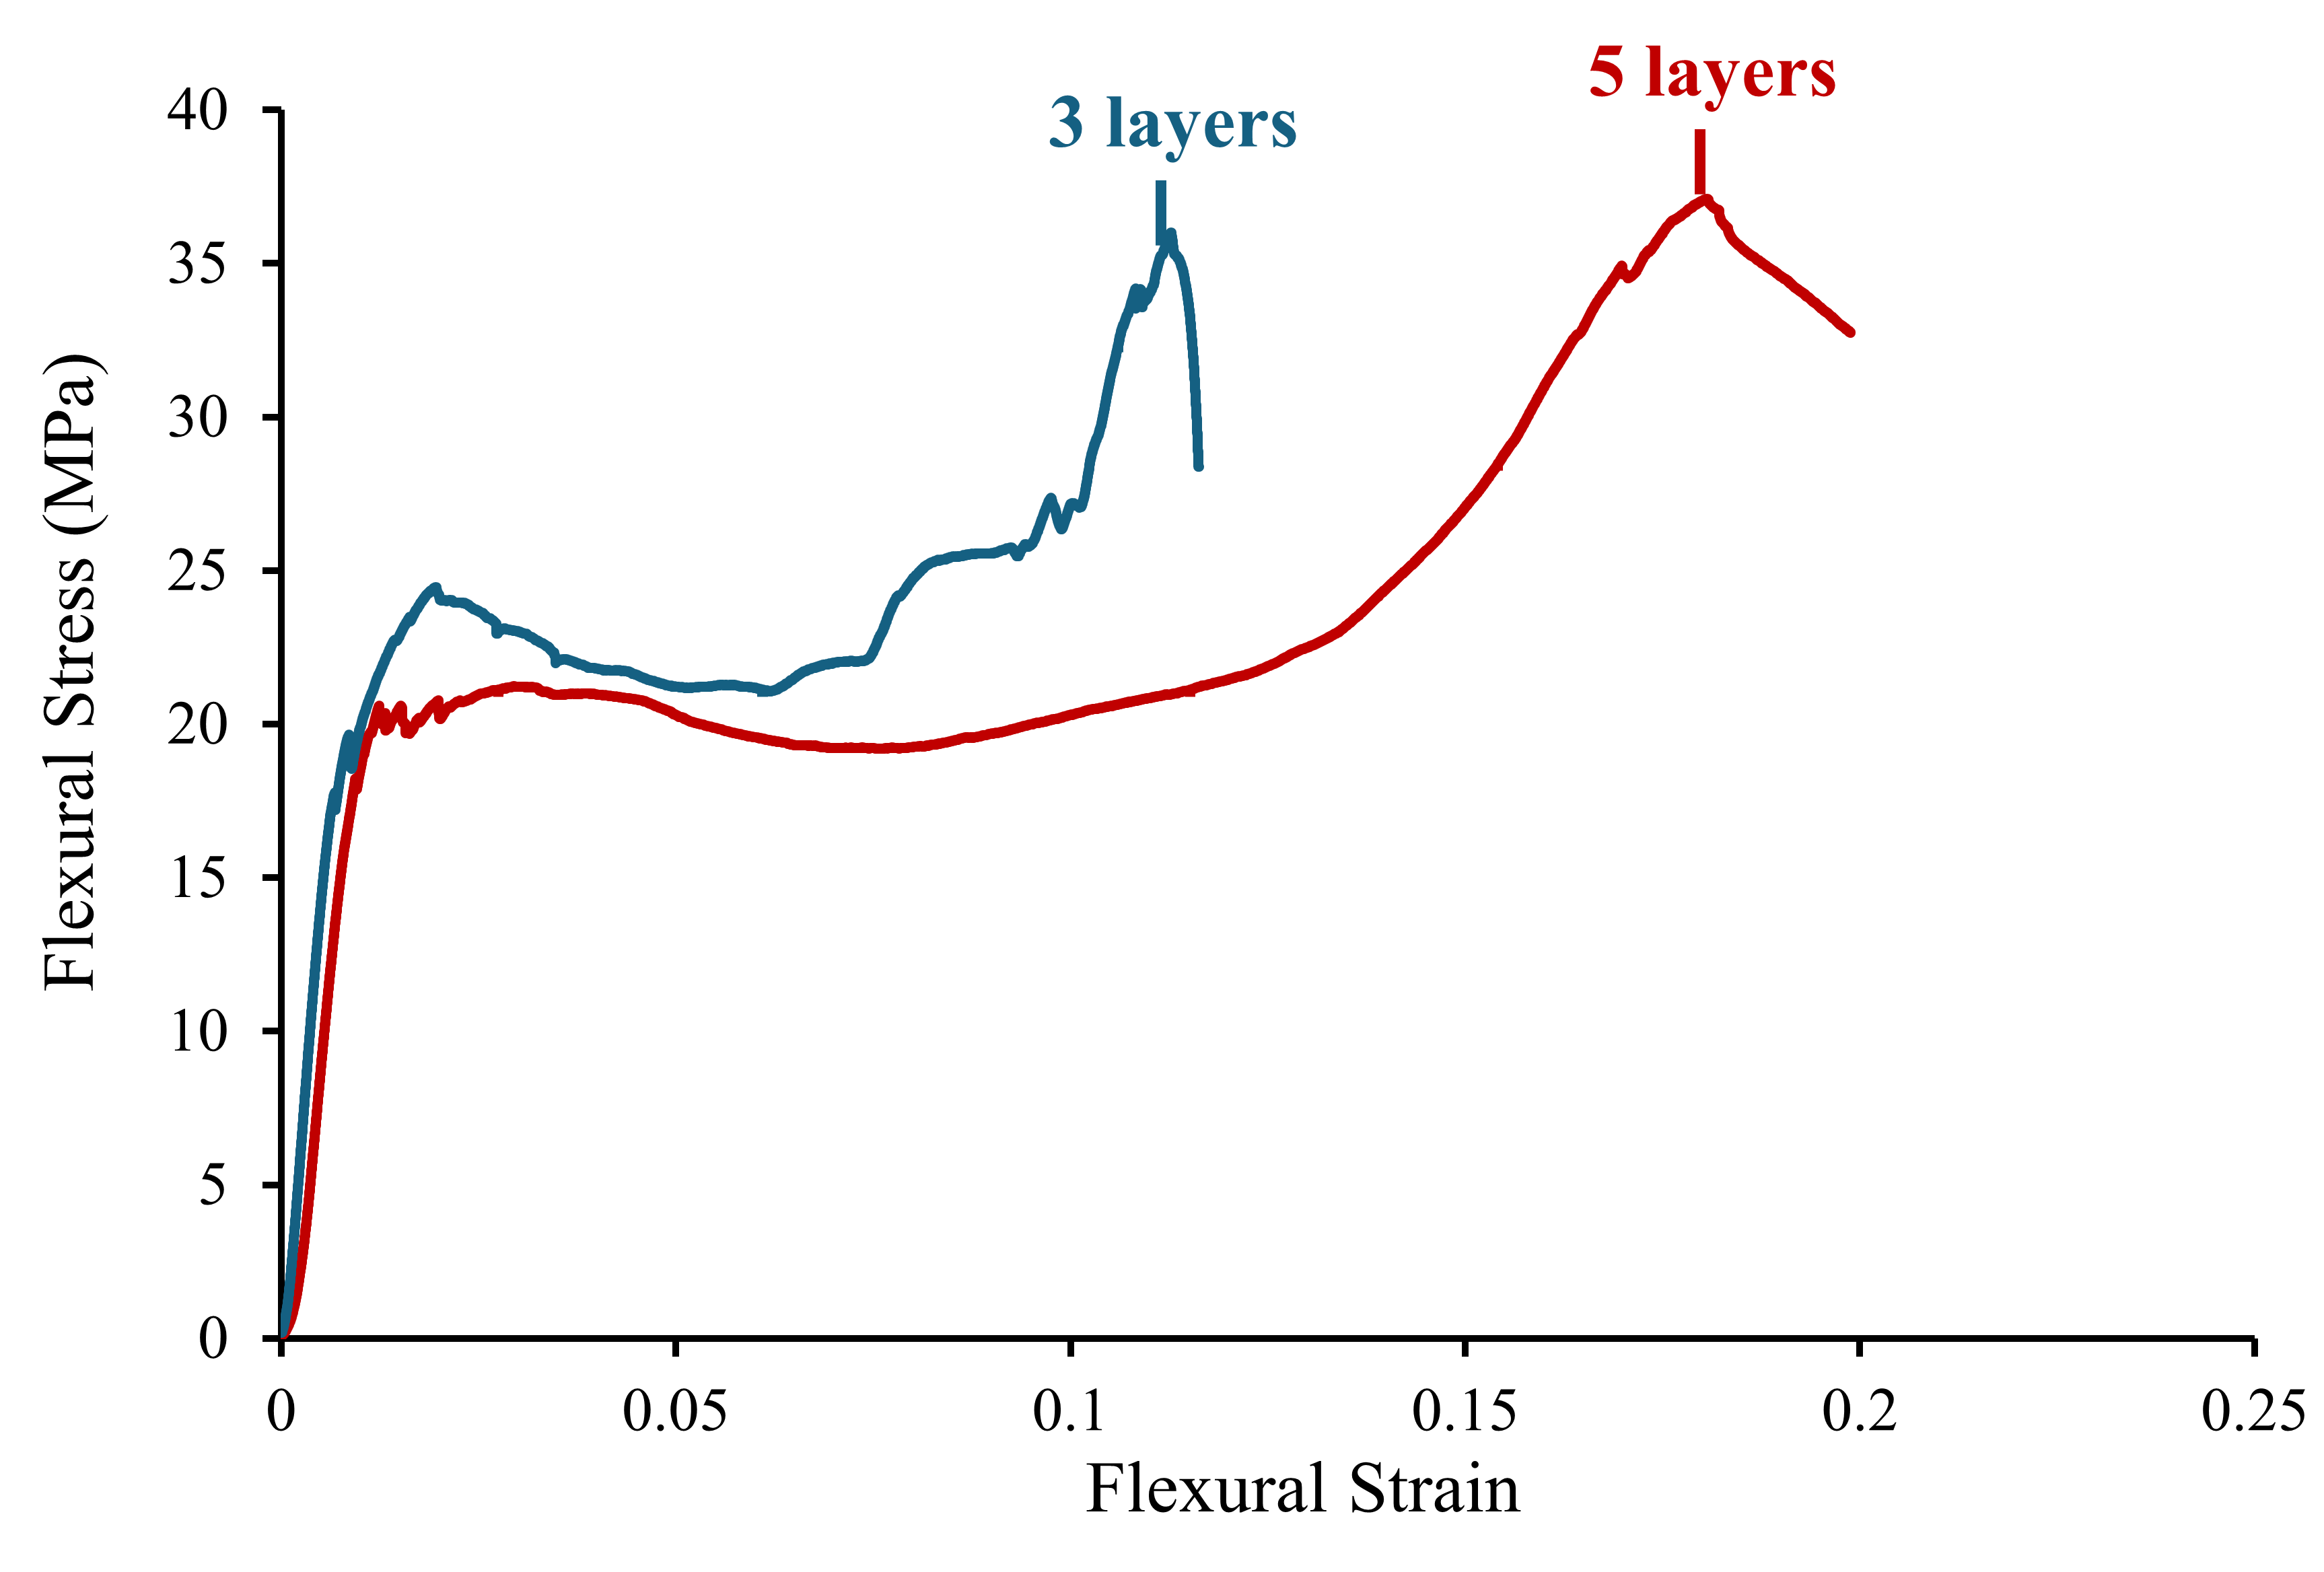


**Supplementary Fig. 17.** The stress-strain curve for the nacre-like composite with 3 layers and 5 layers.

**References**

1 Barinov, S. Work-of-fracture determination for brittle materials. *Journal of materials science letters* **12**, 674-676 (1993).

2 Rice, R. W., Freiman, S. W. & Becher, P. F. Grain‐size dependence of fracture energy in ceramics: I, experiment. *Journal of the American ceramic society* **64**, 345-350 (1981).
